# Supplementary material for: Inhibition of Carbonic Anhydrase IX Suppresses Breast Cancer Cell Motility at the Single-Cell Level
Source: MDPI journal article supplement (doi:10.3390/ijms222111571), 2021-10-26
Supplement: s1 [file s1]

## Supplementary information

### Inhibition of CA IX suppresses breast cancer cell motility at single-cell level

AGNE JANONIENE<sup>a</sup>, LINAS MAŽUTIS<sup>a</sup>, DAUMANTAS MATULIS<sup>a</sup>, VILMA PETRIKAITE<sup>a,b\*</sup>

<sup>a</sup> Institute of Biotechnology, Life Sciences Center, Vilnius University, Vilnius LT-10257, Lithuania

<sup>b</sup> Institute of Cardiology, Lithuanian University of Health Sciences, Kaunas LT-50162, Lithuania

\*Corresponding author e-mail address: VilmaPetrikaite@gmail.com, Tel: +370 686 29383, ORCID: <https://orcid.org/0000-0002-4106-5535>

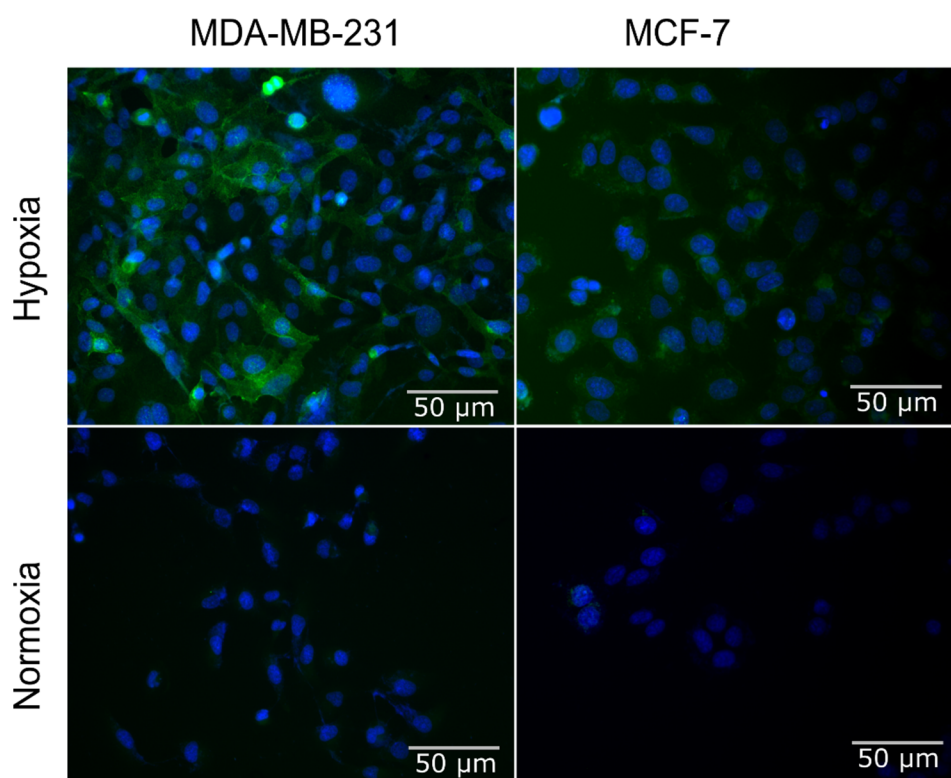

**Figure S1.** Immunofluorescence images of MDA-MB-231 and MCF-7 cells incubated under hypoxia and normoxia conditions. Nucleus are stained with DAPI (blue) and CA IX is with FITC (green). Scale bar is 100 μm.

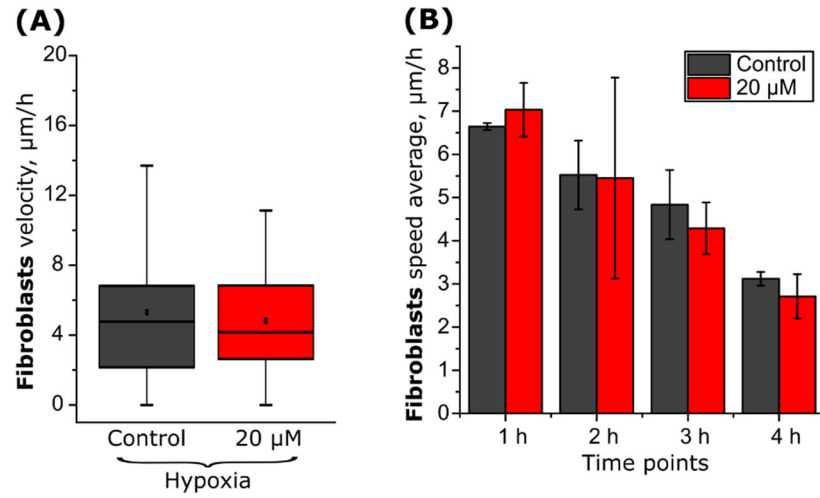

**Figure S2.** Fibroblasts cell velocities (A) and speed changes during the time (B) in the presence (20  $\mu\text{M}$ ) and absence of VD11-4-2 when cells are treated with EGF.
